# Supplementary material for: Multiple and independent origins of short seeded alleles of GS3 in rice
Source: PubMed Central journal article supplement — Breed Sci. 2013 Mar 1;63(1):77–85. doi: 10.1270/jsbbs.63.77 (PMC3621448; doi:10.1270/jsbbs.63.77), 2013-03-01
Supplement: 63_77_1.pdf [file 63_77_1.pdf]

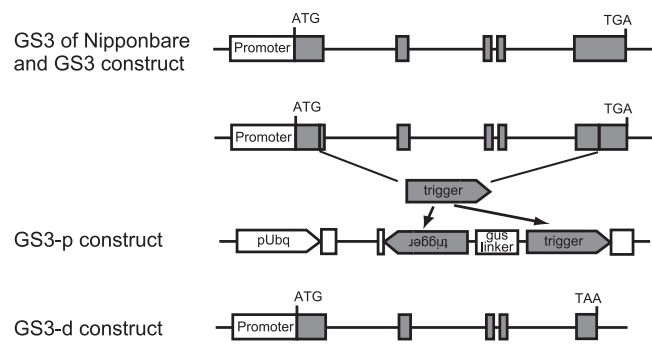

**Supplemental Fig. 1.** The construct designs used for transformation (the GS3 construct, GS3-p construct and GS3-d construct).
