# Supplementary material for: Multiple and independent origins of short seeded alleles of GS3 in rice
Source: PubMed Central journal article supplement — Breed Sci. 2013 Mar 1;63(1):77–85. doi: 10.1270/jsbbs.63.77 (PMC3621448; doi:10.1270/jsbbs.63.77), 2013-03-01
Supplement: 63_77_2.pdf [file 63_77_2.pdf]

Supplemental Table 1. Plant materials used in survey for small seed cultivars

| No. | Accession name     | Origin              | Seed length (mm) |   |      | Seed width (mm) |   |      |
|-----|--------------------|---------------------|------------------|---|------|-----------------|---|------|
|     |                    |                     | Mean             | ± | SD   | Mean            | ± | SD   |
| 1   | H343               | Hokkaido University | 4.99             |   | 0.01 | 3.03            |   | 0.20 |
| 2   | ABRI               | Bhutan              | 5.66             |   | 0.15 | 3.16            |   | 0.05 |
| 3*  | JC73-4             | India               | 5.94             |   | 0.18 | 2.28            |   | 0.08 |
| 4   | Tumo-Tumo          | Malaysia            | 5.94             |   | 0.18 | 2.94            |   | 0.09 |
| 5   | TAL214             | Taiwan              | 5.97             |   | 0.15 | 2.25            |   | 0.10 |
| 6   | JC101              | India               | 6.00             |   | 0.07 | 2.44            |   | 0.05 |
| 7*  | JC157              | India               | 6.14             |   | 0.27 | 2.34            |   | 0.05 |
| 8*  | JC149              | India               | 6.26             |   | 0.18 | 3.04            |   | 0.05 |
| 9   | Podiwi A8          | Sri Lanka           | 6.43             |   | 0.16 | 3.01            |   | 0.07 |
| 10  | ARC 7291           | India               | 6.46             |   | 0.05 | 3.02            |   | 0.04 |
| 11  | Mana Muri          | Nepal               | 6.80             |   | 0.32 | 3.06            |   | 0.05 |
| 12* | Chhote Dhan        | Nepal               | 6.86             |   | 0.11 | 3.12            |   | 0.11 |
| 13* | Hsia-Chioh-Keh-Tu  | Taiwan              | 7.02             |   | 0.11 | 3.02            |   | 0.16 |
| 14  | Patbyeo            | Korea               | 7.06             |   | 0.27 | 3.56            |   | 0.09 |
| 15  | RTS5               | Vietnam             | 7.06             |   | 0.11 | 3.08            |   | 0.08 |
| 16  | Deokjeokjodo       | Korea               | 7.16             |   | 0.15 | 3.58            |   | 0.11 |
| 17  | Farangey           | Bhutan              | 7.16             |   | 0.11 | 3.22            |   | 0.13 |
| 18* | Haginomae Mochi    | Japan               | 7.16             |   | 0.15 | 3.18            |   | 0.08 |
| 19  | Calotoc            | Philippines         | 7.18             |   | 0.15 | 3.18            |   | 0.08 |
| 20  | Shan Kiu Ju        | China               | 7.18             |   | 0.11 | 3.58            |   | 0.08 |
| 21  | Kinandang Patong   | Philippines         | 7.24             |   | 0.05 | 3.46            |   | 0.09 |
| 22  | ARC 10497          | India               | 7.26             |   | 0.23 | 3.12            |   | 0.08 |
| 23* | Miriti             | Bangladesh          | 7.26             |   | 0.13 | 3.22            |   | 0.08 |
| 24  | Rathal             | Sri Lanka           | 7.26             |   | 0.27 | 2.50            |   | 0.07 |
| 25  | Jumali             | Nepal               | 7.30             |   | 0.25 | 3.12            |   | 0.16 |
| 26  | ARC 7047           | India               | 7.30             |   | 0.10 | 3.16            |   | 0.09 |
| 27* | Kibi               | Japan               | 7.32             |   | 0.13 | 3.30            |   | 0.21 |
| 28  | Baghlani Nangarhar | Afghanistan         | 7.34             |   | 0.09 | 3.56            |   | 0.05 |
| 29  | Y Chang Ju         | China               | 7.34             |   | 0.09 | 3.60            |   | 0.07 |
| 30* | Chodongji          | Korea               | 7.34             |   | 0.09 | 3.98            |   | 0.13 |
| 31  | Dianyu 1           | China               | 7.34             |   | 0.11 | 3.50            |   | 0.07 |
| 32  | Kemasin            | Malaysia            | 7.36             |   | 0.13 | 2.66            |   | 0.11 |
| 33* | Kotobuki Mochi     | Japan               | 7.40             |   | 0.21 | 3.32            |   | 0.11 |
| 34  | Ma sho             | Myanmar             | 7.40             |   | 0.16 | 2.86            |   | 0.09 |
| 35* | Nipponbare         | Japan               | 7.40             |   | 0.20 | 3.26            |   | 0.09 |
| 36  | Pai-Kan-Tao        | Taiwan              | 7.40             |   | 0.20 | 3.02            |   | 0.11 |
| 37  | Gompa 2            | India               | 7.42             |   | 0.33 | 3.50            |   | 0.07 |
| 38  | Tima               | Bhutan              | 7.42             |   | 0.16 | 3.52            |   | 0.08 |
| 39  | Lebed              | Philippines         | 7.48             |   | 0.23 | 3.06            |   | 0.13 |
| 40* | Kamenoo            | Japan               | 7.48             |   | 0.13 | 3.38            |   | 0.11 |
| 41* | Dholi Boro         | Bangladesh          | 7.50             |   | 0.21 | 3.02            |   | 0.08 |
| 42* | Phudugey           | Bhutan              | 7.50             |   | 0.14 | 3.18            |   | 0.08 |
| 43  | Ta-Poo-Cho Z       | China               | 7.52             |   | 0.20 | 3.02            |   | 0.16 |
| 44  | Beonjo             | Korea               | 7.54             |   | 0.15 | 3.12            |   | 0.08 |
| 45* | Kasalath           | India               | 7.56             |   | 0.11 | 2.68            |   | 0.08 |
| 46* | Taichung Native 1  | Taiwan              | 7.56             |   | 0.09 | 3.10            |   | 0.07 |
| 47* | Luk Takhar         | Afghanistan         | 7.64             |   | 0.11 | 3.56            |   | 0.09 |
| 48  | Eh-Ia-Chiu         | Taiwan              | 7.66             |   | 0.17 | 3.64            |   | 0.11 |
| 49  | Bamoia 341         | Bangladesh          | 7.66             |   | 0.11 | 3.02            |   | 0.08 |
| 50* | ARC 13829          | India               | 7.68             |   | 0.27 | 3.54            |   | 0.11 |
| 51  | GIE 57             | Vietnam             | 7.68             |   | 0.16 | 2.54            |   | 0.11 |
| 52* | Aichi Asahi        | Japan               | 7.70             |   | 0.07 | 3.48            |   | 0.08 |
| 53* | Chahora 144        | Pakistan            | 7.70             |   | 0.19 | 2.52            |   | 0.18 |
| 54  | Nepal 8            | Nepal               | 7.70             |   | 0.25 | 3.18            |   | 0.11 |
| 55* | Trembese           | Indonesia           | 7.72             |   | 0.31 | 3.24            |   | 0.18 |
| 56  | Basilanon          | Philippines         | 7.76             |   | 0.17 | 2.66            |   | 0.11 |
| 57* | ARC 10177          | India               | 7.78             |   | 0.22 | 3.58            |   | 0.08 |
| 58* | Tepi Boro          | Bangladesh          | 7.78             |   | 0.13 | 2.90            |   | 0.10 |
| 59* | Binulawan          | Philippines         | 7.80             |   | 0.23 | 3.38            |   | 0.11 |
| 60  | Ta-Mao-Tao         | China               | 7.80             |   | 0.22 | 3.52            |   | 0.13 |
| 61  | Aswina             | Bangladesh          | 7.82             |   | 0.08 | 2.86            |   | 0.13 |
| 62  | Kalo Dhan          | Nepal               | 7.84             |   | 0.18 | 3.44            |   | 0.05 |
| 63  | Ma Hae             | Thailand            | 7.84             |   | 0.37 | 3.68            |   | 0.13 |
| 64  | Qingyu (Seiyu)     | Taiwan              | 7.84             |   | 0.11 | 3.32            |   | 0.11 |
| 65  | Radin Goi Sesat    | Malaysia            | 7.86             |   | 0.23 | 3.08            |   | 0.24 |
| 66  | Som Cau 70 A       | Vietnam             | 7.86             |   | 0.13 | 2.66            |   | 0.09 |
| 67  | Gwa Ngasein        | Myanmar             | 7.90             |   | 0.29 | 3.06            |   | 0.05 |
| 68* | Hu-Lo-Tao          | China               | 7.90             |   | 0.19 | 3.62            |   | 0.11 |
| 69* | N 22               | India               | 7.92             |   | 0.33 | 2.78            |   | 0.04 |
| 70  | Ai Chiao Hong      | China               | 7.92             |   | 0.13 | 2.90            |   | 0.10 |
| 71* | Chau               | Vietnam             | 7.94             |   | 0.18 | 3.06            |   | 0.18 |

|      |                               |             |      |      |      |      |
|------|-------------------------------|-------------|------|------|------|------|
| 72*  | Kun-Min-Tsieh-Hunan           | China       | 7.94 | 0.17 | 3.42 | 0.13 |
| 73   | Nhta10                        | India       | 7.96 | 0.13 | 3.90 | 0.10 |
| 74   | Jagli Boro                    | Bangladesh  | 7.98 | 0.13 | 2.84 | 0.05 |
| 75   | Keriting Tinggi               | Indonesia   | 8.00 | 0.10 | 2.68 | 0.11 |
| 76   | Co 18                         | India       | 8.02 | 0.13 | 3.00 | 0.00 |
| 77   | Davao 1                       | Philippines | 8.02 | 0.15 | 3.28 | 0.04 |
| 78   | Padi Lebat                    | Indonesia   | 8.02 | 0.27 | 2.52 | 0.11 |
| 79   | Ryou Suisan Koumai            | China       | 8.02 | 0.16 | 3.20 | 0.14 |
| 80   | Co 13                         | India       | 8.04 | 0.15 | 3.22 | 0.11 |
| 81   | DA11                          | Bangladesh  | 8.04 | 0.22 | 2.40 | 0.07 |
| 82   | Ken Chiao Ju Hsiao Li         | China       | 8.04 | 0.29 | 3.64 | 0.09 |
| 83*  | Nep Hoa Vang                  | Vietnam     | 8.06 | 0.21 | 3.70 | 0.12 |
| 84*  | Arias                         | Indonesia   | 8.06 | 0.15 | 2.52 | 0.13 |
| 85   | Madael                        | Sri Lanka   | 8.08 | 0.20 | 3.12 | 0.08 |
| 86   | Padi Boenar                   | Indonesia   | 8.08 | 0.24 | 3.22 | 0.18 |
| 87   | Pinulupot 1                   | Philippines | 8.08 | 0.04 | 2.96 | 0.09 |
| 88*  | Pankhari 203                  | India       | 8.10 | 0.12 | 2.48 | 0.15 |
| 89   | Chitraj(DA 23)                | Bangladesh  | 8.10 | 0.22 | 2.70 | 0.12 |
| 90*  | Co 25                         | India       | 8.10 | 0.31 | 2.88 | 0.13 |
| 91*  | JC1                           | India       | 8.12 | 0.13 | 2.96 | 0.11 |
| 92   | Kaluheenati                   | Sri Lanka   | 8.12 | 0.13 | 3.04 | 0.09 |
| 93   | ARC 5955                      | India       | 8.14 | 0.17 | 2.74 | 0.05 |
| 94   | JC111                         | India       | 8.14 | 0.27 | 2.28 | 0.08 |
| 95   | Nepal 555                     | India       | 8.14 | 0.17 | 3.06 | 0.13 |
| 96   | IR42                          | Philippines | 8.18 | 0.16 | 2.56 | 0.05 |
| 97*  | MTU9                          | India       | 8.18 | 0.40 | 3.22 | 0.15 |
| 98   | Neang Menh                    | Cambodia    | 8.18 | 0.11 | 2.58 | 0.08 |
| 99   | Asu                           | Bhutan      | 8.18 | 0.16 | 2.92 | 0.08 |
| 100  | Carreon                       | Philippines | 8.18 | 0.25 | 3.26 | 0.13 |
| 101  | ARC 7229                      | India       | 8.20 | 0.16 | 3.44 | 0.05 |
| 102  | Badari Dhan                   | Nepal       | 8.22 | 0.13 | 3.34 | 0.15 |
| 103  | Tupa729                       | Bangladesh  | 8.22 | 0.19 | 3.30 | 0.12 |
| 104  | Khao Nam Jen                  | Laos        | 8.24 | 0.28 | 3.96 | 0.09 |
| 105  | Khau Tan Chiem                | Vietnam     | 8.24 | 0.18 | 3.40 | 0.16 |
| 106* | Padi Kasalle                  | Indonesia   | 8.24 | 0.18 | 3.52 | 0.11 |
| 107* | ARC 10352                     | India       | 8.26 | 0.19 | 2.94 | 0.11 |
| 108  | Padi Kuning                   | Indonesia   | 8.26 | 0.24 | 3.14 | 0.05 |
| 109  | Pachehai Perumal              | India       | 8.28 | 0.13 | 3.50 | 0.07 |
| 110  | Ratul                         | India       | 8.28 | 0.22 | 3.10 | 0.10 |
| 111  | PTB25                         | India       | 8.28 | 0.28 | 3.10 | 0.10 |
| 112* | DA13                          | Bangladesh  | 8.30 | 0.23 | 2.28 | 0.08 |
| 113  | Tong-IL                       | Korea       | 8.30 | 0.30 | 3.12 | 0.13 |
| 114  | DA9                           | Bangladesh  | 8.32 | 0.22 | 2.04 | 0.09 |
| 115  | Padi Perak                    | Indonesia   | 8.32 | 0.22 | 3.06 | 0.05 |
| 116* | Kalukantha                    | Sri Lanka   | 8.32 | 0.19 | 3.20 | 0.10 |
| 117* | Seratoes Hari                 | Indonesia   | 8.32 | 0.25 | 2.40 | 0.07 |
| 118  | Gemjya Jyanam                 | Bhutan      | 8.32 | 0.08 | 3.02 | 0.04 |
| 119  | ARC 10317                     | India       | 8.34 | 0.11 | 3.02 | 0.08 |
| 120  | Hei Chiao Chui Li Hsiang Keng | China       | 8.34 | 0.24 | 3.50 | 0.12 |
| 121  | Jarjan                        | Bhutan      | 8.34 | 0.19 | 2.98 | 0.04 |
| 122* | Peh-Kuh-Tsao-Tu               | Taiwan      | 8.34 | 0.27 | 3.26 | 0.15 |
| 123  | Baran Boro                    | Bangladesh  | 8.36 | 0.26 | 3.16 | 0.05 |
| 124* | Kiang-Chou-Chiu               | Taiwan      | 8.36 | 0.17 | 3.20 | 0.14 |
| 125  | Sinna Sithira Kali            | Sri Lanka   | 8.38 | 0.16 | 3.10 | 0.12 |
| 126  | JC92                          | India       | 8.38 | 0.29 | 2.50 | 0.12 |
| 127* | Rathuwee                      | Sri Lanka   | 8.40 | 0.19 | 2.74 | 0.11 |
| 128  | DA8                           | Bangladesh  | 8.42 | 0.26 | 3.04 | 0.11 |
| 129  | Karkati 87                    | Bangladesh  | 8.42 | 0.22 | 3.08 | 0.04 |
| 130  | Milyang 55                    | Korea       | 8.42 | 0.23 | 2.90 | 0.12 |
| 131  | Birain 360                    | Bangladesh  | 8.46 | 0.21 | 2.50 | 0.10 |
| 132* | Cicli Beton                   | Indonesia   | 8.48 | 0.35 | 3.40 | 0.14 |
| 133  | Khao Dam                      | Laos        | 8.48 | 0.35 | 4.20 | 0.10 |
| 134  | Tetep                         | Vietnam     | 8.48 | 0.19 | 2.90 | 0.10 |
| 135  | Iguape Cateto                 | Haiti       | 8.50 | 0.19 | 3.26 | 0.09 |
| 136  | Milyang 23                    | Korea       | 8.50 | 0.14 | 3.04 | 0.09 |
| 137  | Naba                          | India       | 8.50 | 0.12 | 2.72 | 0.08 |
| 138  | Tadukan                       | Philippines | 8.50 | 0.27 | 2.74 | 0.05 |
| 139* | Yelaik Meedon                 | Myanmar     | 8.50 | 0.19 | 3.64 | 0.13 |
| 140  | Macan Binundok                | Philippines | 8.52 | 0.13 | 2.94 | 0.09 |
| 141  | Neang Phtong                  | Cambodia    | 8.52 | 0.04 | 2.76 | 0.05 |
| 142  | Maraya                        | Indonesia   | 8.54 | 0.23 | 3.06 | 0.05 |
| 143  | Bei Khe                       | Cambodia    | 8.56 | 0.29 | 2.56 | 0.11 |
| 144  | Ta Hung Ku                    | China       | 8.56 | 0.19 | 3.46 | 0.05 |
| 145  | Deng Pao Zhai                 | China       | 8.58 | 0.13 | 3.32 | 0.04 |

|      |                          |               |      |      |      |      |
|------|--------------------------|---------------|------|------|------|------|
| 146  | Urasan 1                 | Japan         | 8.58 | 0.08 | 3.60 | 0.10 |
| 147* | Chiem Chanh              | Vietnam       | 8.60 | 0.23 | 2.76 | 0.05 |
| 148  | Surjamkuhi               | India         | 8.60 | 0.26 | 2.68 | 0.08 |
| 149* | Tchampa                  | Iran          | 8.62 | 0.22 | 3.38 | 0.08 |
| 150  | Anjana Dhan              | Nepal         | 8.62 | 0.25 | 2.80 | 0.07 |
| 151  | Tupa 121-3               | Bangladesh    | 8.64 | 0.24 | 2.76 | 0.19 |
| 152  | Carolina Gold            | United States | 8.66 | 0.21 | 3.14 | 0.09 |
| 153  | Goai                     | Bangladesh    | 8.66 | 0.38 | 3.10 | 0.14 |
| 154  | JC93                     | India         | 8.66 | 0.23 | 2.76 | 0.05 |
| 155  | NP125                    | India         | 8.66 | 0.21 | 2.30 | 0.10 |
| 156  | Jinguoyin                | China         | 8.68 | 0.27 | 3.58 | 0.08 |
| 157  | IR58                     | Philippines   | 8.68 | 0.26 | 2.72 | 0.13 |
| 158  | Poenot Hitam             | Indonesia     | 8.68 | 0.22 | 3.36 | 0.15 |
| 159* | Lal Aman                 | India         | 8.72 | 0.25 | 3.04 | 0.15 |
| 160  | Tres Meses               | Brazil        | 8.72 | 0.30 | 3.34 | 0.13 |
| 161  | Padi Raoekang            | Indonesia     | 8.72 | 0.22 | 3.08 | 0.16 |
| 162  | Jhona 26                 | Pakistan      | 8.72 | 0.29 | 2.82 | 0.16 |
| 163  | Khau Mac Kho             | Vietnam       | 8.74 | 0.17 | 4.16 | 0.09 |
| 164  | IR5                      | Philippines   | 8.76 | 0.21 | 3.08 | 0.04 |
| 165  | JC120                    | India         | 8.76 | 0.21 | 2.86 | 0.09 |
| 166  | TD 2                     | Thailand      | 8.76 | 0.05 | 3.82 | 0.04 |
| 167  | Raminad Strain 3         | Philippines   | 8.78 | 0.26 | 2.84 | 0.18 |
| 168  | IR30                     | Philippines   | 8.80 | 0.16 | 2.52 | 0.08 |
| 169  | Colombia 1               | Colombia      | 8.80 | 0.12 | 2.44 | 0.09 |
| 170  | DA7                      | Bangladesh    | 8.80 | 0.12 | 3.14 | 0.11 |
| 171  | Pa-Tou-Hung              | China         | 8.80 | 0.21 | 3.36 | 0.11 |
| 172  | Padi Hojong              | Indonesia     | 8.80 | 0.10 | 3.30 | 0.12 |
| 173* | Baguamon 14              | Bangladesh    | 8.82 | 0.25 | 2.68 | 0.08 |
| 174  | Fossa Hv                 | Burkina Faso  | 8.84 | 0.36 | 3.10 | 0.28 |
| 175  | IR8                      | Philippines   | 8.84 | 0.30 | 3.00 | 0.12 |
| 176  | Shuusoushu               | China         | 8.84 | 0.09 | 3.06 | 0.05 |
| 177* | Black Gora(NCS 12)       | India         | 8.86 | 0.26 | 3.24 | 0.09 |
| 178  | C 22                     | Philippines   | 8.90 | 0.16 | 2.78 | 0.04 |
| 179  | Shoni                    | Bangladesh    | 8.90 | 0.16 | 3.32 | 0.13 |
| 180  | ARC 11094                | India         | 8.90 | 0.07 | 3.00 | 0.10 |
| 181  | Jena 035                 | Nepal         | 8.90 | 0.30 | 3.38 | 0.04 |
| 182  | Keiboba                  | China         | 8.90 | 0.12 | 3.02 | 0.08 |
| 183* | Patnai 23                | India         | 8.90 | 0.16 | 2.36 | 0.05 |
| 184  | Peta                     | Indonesia     | 8.90 | 0.23 | 2.78 | 0.04 |
| 185* | Shai-Kuh                 | China         | 8.90 | 0.16 | 3.04 | 0.11 |
| 186* | Gotak Gatik              | Indonesia     | 8.92 | 0.30 | 2.56 | 0.11 |
| 187  | IR60                     | Philippines   | 8.92 | 0.22 | 2.44 | 0.09 |
| 188  | IRAT 13                  | Ivory Coast   | 8.96 | 0.11 | 3.60 | 0.07 |
| 189* | Lac23                    | Liberia       | 8.98 | 0.26 | 3.36 | 0.09 |
| 190  | TD25                     | Thailand      | 8.98 | 0.25 | 3.78 | 0.11 |
| 191  | Thierno bande            | Senegal       | 9.02 | 0.20 | 2.72 | 0.11 |
| 192  | Avo 742                  | Madagascar    | 9.04 | 0.11 | 2.94 | 0.05 |
| 193* | Dular                    | India         | 9.04 | 0.15 | 2.68 | 0.39 |
| 194  | Malagkit Pirurutong      | Philippines   | 9.04 | 0.17 | 3.72 | 0.11 |
| 195  | Taothabi                 | India         | 9.08 | 0.16 | 2.92 | 0.13 |
| 196  | Canela De Ferro          | Brazil        | 9.10 | 0.07 | 3.54 | 0.09 |
| 197  | Ketan Genca Rasi         | Indonesia     | 9.12 | 0.24 | 3.54 | 0.05 |
| 198  | Rambhog                  | Indonesia     | 9.12 | 0.22 | 2.84 | 0.05 |
| 199  | Kataktara Da 2           | Bangladesh    | 9.12 | 0.08 | 2.82 | 0.04 |
| 200* | Gerdeh                   | Iran          | 9.14 | 0.21 | 3.60 | 0.10 |
| 201  | Khao Nok                 | Laos          | 9.14 | 0.25 | 4.26 | 0.05 |
| 202  | Pate Blanc Mn 1          | Ivory Coast   | 9.14 | 0.26 | 3.44 | 0.05 |
| 203  | IR54                     | Philippines   | 9.16 | 0.26 | 2.58 | 0.19 |
| 204  | N 12                     | India         | 9.16 | 0.25 | 2.26 | 0.09 |
| 205  | Domsiah                  | Iran          | 9.18 | 0.13 | 2.74 | 0.05 |
| 206* | IR36                     | Philippines   | 9.18 | 0.13 | 2.48 | 0.08 |
| 207  | Lageado                  | Brazil        | 9.20 | 0.16 | 2.50 | 0.12 |
| 208  | Short Grain              | Thailand      | 9.20 | 0.23 | 2.78 | 0.13 |
| 209* | Davao                    | Philippines   | 9.20 | 0.26 | 3.50 | 0.07 |
| 210  | Gaukkyi                  | Myanmar       | 9.22 | 0.43 | 2.96 | 0.21 |
| 211  | Makalioka 34             | Madagascar    | 9.22 | 0.19 | 2.42 | 0.08 |
| 212  | Arang                    | Indonesia     | 9.22 | 0.23 | 3.06 | 0.15 |
| 213  | Peh-Pi-Nuo               | China         | 9.26 | 0.11 | 3.86 | 0.13 |
| 214* | Gharib                   | Iran          | 9.28 | 0.30 | 3.36 | 0.11 |
| 215* | IR24                     | Philippines   | 9.30 | 0.25 | 2.56 | 0.09 |
| 216  | PTB30                    | India         | 9.30 | 0.17 | 3.38 | 0.16 |
| 217  | Dhola Aman(Lowland Aman) | Bangladesh    | 9.32 | 0.29 | 2.54 | 0.05 |
| 218  | Fandrapotsy 104          | Madagascar    | 9.40 | 0.07 | 2.56 | 0.05 |
| 219  | Vary Futsi               | Madagascar    | 9.40 | 0.07 | 3.34 | 0.05 |

|      |                          |               |       |      |      |      |
|------|--------------------------|---------------|-------|------|------|------|
| 220  | IR43                     | Philippines   | 9.42  | 0.19 | 2.98 | 0.04 |
| 221* | Basmati 217              | India         | 9.46  | 0.17 | 2.26 | 0.15 |
| 222  | Local Basmati            | India         | 9.46  | 0.24 | 3.00 | 0.12 |
| 223  | Maintimolotsy 1226       | Madagascar    | 9.46  | 0.27 | 3.32 | 0.22 |
| 224  | Basmati 370              | Bangladesh    | 9.48  | 0.08 | 2.32 | 0.13 |
| 225  | Muha                     | India         | 9.48  | 0.29 | 2.98 | 0.04 |
| 227  | 63-104                   | Ivory Coast   | 9.52  | 0.24 | 3.38 | 0.11 |
| 226  | Rojofotsy 738            | Madagascar    | 9.52  | 0.35 | 3.08 | 0.18 |
| 228* | Moroberekan              | Guinea        | 9.56  | 0.29 | 3.46 | 0.05 |
| 229  | Pin Tawng                | Thailand      | 9.56  | 0.11 | 2.74 | 0.09 |
| 230* | Rexmont                  | USA           | 9.58  | 0.20 | 2.68 | 0.08 |
| 231  | IR74                     | Philippines   | 9.68  | 0.16 | 2.52 | 0.04 |
| 232  | Bleiyo                   | Thailand      | 9.70  | 0.23 | 2.64 | 0.05 |
| 233  | Jhona 2                  | India         | 9.70  | 0.19 | 2.78 | 0.04 |
| 234  | IR29                     | Philippines   | 9.76  | 0.30 | 2.58 | 0.08 |
| 235  | Bengiza                  | Madagascar    | 9.78  | 0.16 | 2.98 | 0.27 |
| 236  | Chaing Roneal            | Cambodia      | 9.78  | 0.16 | 2.64 | 0.11 |
| 237  | Intan                    | Indonesia     | 9.78  | 0.23 | 2.62 | 0.13 |
| 238* | DA5                      | Bangladesh    | 9.80  | 0.35 | 2.70 | 0.14 |
| 239* | Cere Air                 | Indonesia     | 9.82  | 0.18 | 2.50 | 0.00 |
| 240* | T 1                      | India         | 9.86  | 0.23 | 2.20 | 0.14 |
| 241  | Tan Sibuku               | Malaysia      | 9.86  | 0.27 | 2.88 | 0.11 |
| 242* | IR64                     | Philippines   | 9.88  | 0.04 | 2.52 | 0.08 |
| 243* | Kitrana 508              | Madagascar    | 9.88  | 0.13 | 2.48 | 0.13 |
| 244* | Bico Branco              | Brazil        | 9.88  | 0.18 | 3.44 | 0.09 |
| 245  | Kaukkyisaw               | Myanmar       | 9.90  | 0.10 | 3.66 | 0.05 |
| 246  | OS4                      | West Africa   | 9.90  | 0.25 | 3.04 | 0.09 |
| 247  | Azucena                  | Philippines   | 9.90  | 0.24 | 2.88 | 0.13 |
| 248  | Popot                    | Indonesia     | 9.92  | 0.29 | 2.66 | 0.09 |
| 249* | Pin Kaeo                 | United States | 9.92  | 0.08 | 2.64 | 0.13 |
| 250* | Khao Gaew                | Thailand      | 9.96  | 0.05 | 2.74 | 0.09 |
| 251  | Chianung Si-Pi 661020    | Taiwan        | 9.96  | 0.13 | 2.68 | 0.08 |
| 252  | Kaw Luyoeng              | Thailand      | 9.96  | 0.23 | 2.80 | 0.07 |
| 253* | IAC25                    | Brazil        | 10.00 | 0.10 | 3.08 | 0.08 |
| 254  | Silad                    | Malaysia      | 10.00 | 0.22 | 2.72 | 0.08 |
| 255  | Khao Kap Xang            | Laos          | 10.02 | 0.13 | 3.80 | 0.14 |
| 256  | Puluik Arang             | Indonesia     | 10.02 | 0.16 | 3.32 | 0.13 |
| 257  | De Abril                 | Brazil        | 10.04 | 0.15 | 2.72 | 0.11 |
| 258* | Khao Dawk Mali 105       | Thailand      | 10.04 | 0.11 | 2.46 | 0.09 |
| 259  | Leuang Pratew            | Thailand      | 10.04 | 0.27 | 2.84 | 0.11 |
| 260  | Pelita Janggung          | Indonesia     | 10.04 | 0.18 | 2.78 | 0.08 |
| 261  | RT1031-69                | Zaire         | 10.04 | 0.18 | 3.48 | 0.04 |
| 262  | Mehr                     | Iran          | 10.04 | 0.11 | 2.52 | 0.08 |
| 263* | Cuba 65                  | Cuba          | 10.06 | 0.11 | 2.84 | 0.13 |
| 264  | Kalamkati                | India         | 10.06 | 0.24 | 2.66 | 0.05 |
| 265* | Badkalamkati             | India         | 10.08 | 0.19 | 2.56 | 0.13 |
| 266  | DA1                      | India         | 10.08 | 0.16 | 2.74 | 0.09 |
| 267* | Tsipala 421              | Madagascar    | 10.10 | 0.14 | 2.32 | 0.08 |
| 268* | RTS4                     | Vietnam       | 10.12 | 0.23 | 2.42 | 0.08 |
| 269  | IRAT 144                 | Ivory Coast   | 10.16 | 0.09 | 3.62 | 0.13 |
| 270* | Darmali                  | Nepal         | 10.18 | 0.29 | 2.72 | 0.04 |
| 271  | Dom-Zard                 | Iran          | 10.20 | 0.35 | 2.68 | 0.08 |
| 272  | IR56                     | Philippines   | 10.20 | 0.14 | 2.62 | 0.08 |
| 273  | Bingala                  | Myanmar       | 10.24 | 0.21 | 2.78 | 0.08 |
| 274  | Lambayque 1              | Peru          | 10.24 | 0.11 | 2.30 | 0.12 |
| 275* | Dourado Precoco(IAC 369) | Brazil        | 10.24 | 0.18 | 3.22 | 0.08 |
| 276* | Firooz                   | Iran          | 10.24 | 0.15 | 2.50 | 0.07 |
| 277  | Nam Sa-Gui 19            | Thailand      | 10.28 | 0.20 | 2.52 | 0.08 |
| 278  | Jaguary                  | Brazil        | 10.30 | 0.19 | 3.78 | 0.08 |
| 279* | Sintane Diofor           | Burkina Faso  | 10.30 | 0.28 | 3.40 | 0.14 |
| 280  | Pratao                   | Brazil        | 10.40 | 0.16 | 2.76 | 0.05 |
| 281  | Shwe Nang Gyi            | Myanmar       | 10.50 | 0.07 | 2.60 | 0.10 |
| 282* | Champa Tong 54           | Thailand      | 10.52 | 0.24 | 2.66 | 0.18 |

\*: The accessions overlapped with the 235 accessions that were previously investigated (Takano-Kai et al. 2009).
